# Supplementary material for: Association between Intra- and Extra-Cellular Water Ratio Imbalance and Natriuretic Peptides in Patients Undergoing Hemodialysis
Source: MDPI journal article supplement (doi:10.3390/nu15051274), 2023-03-03

**Supplemental Table S1. Body fluid composition according to the post-hemodialysis ECW/ICW ratio quartiles in men**

| Body fluid composition            | Post-dialysis ECW/ICW ratio        |                                            |                                            |                                    | <i>P for trend</i> |
|-----------------------------------|------------------------------------|--------------------------------------------|--------------------------------------------|------------------------------------|--------------------|
|                                   | Quartile 1<br>Men <0.611<br>(n=66) | Quartile 2<br>Men<br>0.611–0.637<br>(n=65) | Quartile 3<br>Men<br>0.658–0.662<br>(n=65) | Quartile 4<br>Men 0.663≤<br>(n=65) |                    |
| Body weight, kg                   | 70.6<br>(63.3–79.2)                | 62.8<br>(58.2–69.8)                        | 60.2<br>(58.2–69.8)                        | 57.9<br>(52.3–67.8)                | <0.001             |
| Body surface area, m <sup>2</sup> | 1.81<br>(1.71–1.96)                | 1.72<br>(1.64–1.81)                        | 1.68<br>(1.56–1.80)                        | 1.64<br>(1.54–1.79)                | <0.001             |
| Total body water, l               | 39.3<br>(35.2–43.6)                | 35.8<br>(33.0–40.0)                        | 33.5<br>(31.0–37.0)                        | 33.5<br>(31.0–38.2)                | 0.007              |
| Total body water, l<br>per BSA    | 21.7<br>(20.3–22.8)                | 21.0<br>(19.7–21.9)                        | 20.0<br>(18.8–21.3)                        | 20.5<br>(19.3–21.8)                | 0.37               |
| Intracellular water, l            | 24.7<br>(22.0–27.2)                | 22.0<br>(20.4–24.7)                        | 20.3<br>(18.8–22.5)                        | 19.8<br>(18.4–22.7)                | <0.001             |
| Intracellular water, l<br>per BSA | 13.5<br>(12.8–14.9)                | 12.9<br>(12.2–13.5)                        | 12.1<br>(11.3–12.9)                        | 12.1<br>(11.5–12.9)                | 0.002              |
| Extracellular water, l            | 14.7<br>(13.2–16.4)                | 13.7<br>(12.7–15.3)                        | 13.3<br>(12.2–14.6)                        | 13.5<br>(12.6–15.5)                | 0.60               |
| Extracellular water, l<br>per BSA | 8.0<br>(7.6–8.5)                   | 8.0<br>(7.6–8.4)                           | 7.9<br>(7.4–8.4)                           | 8.4<br>(7.8–8.8)                   | 0.009              |
| Muscle, kg                        | 10.7<br>(9.5–11.8)                 | 9.5<br>(8.9–10.7)                          | 8.8<br>(8.1–10.7)                          | 8.6<br>(7.9–9.9)                   | <0.001             |
| %Muscle, %                        | 14.9<br>(14.0–16.1)                | 14.9<br>(13.9–16.0)                        | 14.3<br>(13.6–15.6)                        | 14.7<br>(13.7–16.1)                | 0.11               |
| Mineral, kg                       | 3.57<br>(3.24–3.95)                | 3.27<br>(2.94–3.66)                        | 3.06<br>(2.78–3.36)                        | 3.01<br>(2.74–3.35)                | <0.001             |
| %Mineral, %                       | 5.0<br>(4.7–5.4)                   | 5.1<br>(4.7–5.5)                           | 4.9<br>(4.6–5.5)                           | 5.2<br>(4.7–5.8)                   | 0.46               |
| Fat, kg                           | 18.7<br>(12.6–23.3)                | 14.9<br>(10.9–20.3)                        | 15.2<br>(11.0–21.2)                        | 12.9<br>(8.8–19.1)                 | 0.08               |
| %Fat, %                           | 25.6<br>(18.7–30.2)                | 24.1<br>(18.2–29.0)                        | 26.7<br>(19.0–30.7)                        | 22.9<br>(16.0–28.2)                | 0.32               |

ECW/ICW, the extracellular to intracellular water; BSA, body surface area

**Supplemental Table S2. Body fluid composition according to the post-hemodialysis ECW/ICW ratio quartiles in men**

| Body fluid composition            | Post-dialysis ECW/ICW ratio          |                                              |                                              |                                       | <i>P for trend</i> |
|-----------------------------------|--------------------------------------|----------------------------------------------|----------------------------------------------|---------------------------------------|--------------------|
|                                   | Quartile 1<br>Women <0.627<br>(n=26) | Quartile 2<br>Women<br>0.628–0.649<br>(n=27) | Quartile 3<br>Women<br>0.650–0.673<br>(n=27) | Quartile 4<br>Women 0.674 ≤<br>(n=27) |                    |
| Body weight, kg                   | 52.8<br>(40.4 to 66.7)               | 49.3<br>(42.1 to 59.6)                       | 48.4<br>(44.5 to 59.5)                       | 46.8<br>(41.9 to 52.3)                | 0.006              |
| Body surface area, m <sup>2</sup> | 1.53<br>(1.42 to 1.66)               | 1.45<br>(1.35 to 1.58)                       | 1.47<br>(1.39 to 1.59)                       | 1.41<br>(1.30 to 1.47)                | 0.002              |
| Total body water, l               | 27.6<br>(25.4 to 30.9)               | 25.3<br>(23.8 to 27.3)                       | 25.8<br>(24.2 to 28.4)                       | 24.1<br>(22.1 to 25.9)                | 0.007              |
| Total body water, l<br>per BSA    | 18.2<br>(17.0 to 19.0)               | 18.0<br>(16.2 to 18.7)                       | 17.4<br>(16.5 to 18.3)                       | 17.3<br>(16.0 to 18.6)                | 0.37               |
| Intracellular water, l            | 17.2<br>(16.0 to 19.1)               | 15.5<br>(13.9 to 16.7)                       | 15.6<br>(14.6 to 18.2)                       | 14.2<br>(12.9 to 15.4)                | <0.001             |
| Intracellular water, l<br>per BSA | 11.4<br>(10.6 to 11.8)               | 11.0<br>(10.4 to 11.4)                       | 10.5<br>(9.9 to 11.1)                        | 10.1<br>(9.5 to 11.1)                 | 0.002              |
| Extracellular water, l            | 10.5<br>(9.5 to 11.7)                | 9.8<br>(9.2 to 10.6)                         | 10.2<br>(9.6 to 11.3)                        | 9.8<br>(9.2 to 10.5)                  | 0.60               |
| Extracellular water, l<br>per BSA | 6.8<br>(6.5 to 7.2)                  | 7.0<br>(6.6 to 7.3)                          | 6.9<br>(6.5 to 7.3)                          | 7.1<br>(6.5 to 7.6)                   | 0.009              |
| Muscle, kg                        | 7.5<br>(7.0 to 8.2)                  | 6.7<br>(6.3 to 7.2)                          | 6.7<br>(6.3 to 7.4)                          | 6.1<br>(5.7 to 6.6)                   | <0.001             |
| %Muscle, %                        | 13.3<br>(12.0 to 14.7)               | 13.1<br>(11.9 to 15.7)                       | 13.6<br>(11.6 to 15.4)                       | 13.6<br>(11.9 to 14.7)                | 0.84               |
| Mineral, kg                       | 2.54<br>(2.35 to 3.04)               | 2.45<br>(2.28 to 2.74)                       | 2.46<br>(2.27 to 2.66)                       | 2.37<br>(2.20 to 2.63)                | 0.34               |
| %Mineral, %                       | 4.8<br>(4.2 to 5.4)                  | 4.9<br>(4.5 to 6.0)                          | 5.0<br>(4.1 to 5.8)                          | 5.3<br>(4.9 to 5.8)                   | 0.020              |
| Fat, kg                           | 16.3<br>(13.0 to 26.8)               | 17.7<br>(8.4 to 20.8)                        | 14.0<br>(9.2 to 24.0)                        | 12.5<br>(10.2 to 19.3)                | 0.06               |
| %Fat, %                           | 32.6<br>(25.8 to 39.4)               | 32.0<br>(19.8 to 37.2)                       | 28.9<br>(21.1 to 40.0)                       | 28.4<br>(22.6 to 36.9)                | 0.30               |

ECW/ICW, the extracellular to intracellular water; BSA, body surface area

**Supplemental Figure S1. ECW/TBW ratio according to the post-hemodialysis ECW/ICW ratio quartiles**

ATM, adipose tissue mass; ECW, extracellular water; ICW, intracellular water; TBW, total body water; UF, ultrafiltration

Foot note, ECW in adipose tissue was calculated as adipose tissue contains about 15% ECW.

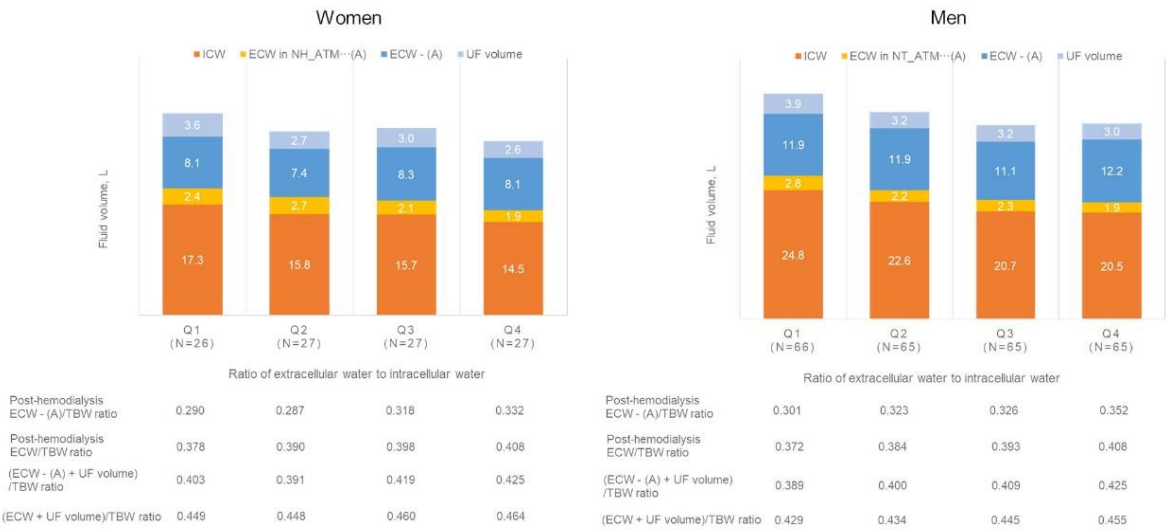

Supplement: s1 [file s1]
